# Supplementary figures and images for: Confidence and Attitudes Toward Osteoarthritis Care Among the Current and Emerging Health Workforce: A Multinational Interprofessional Study
Source: PubMed Central journal article supplement — ACR Open Rheumatol. 2019 May 22;1(4):219–35. doi: 10.1002/acr2.1032 (PMC6857979; doi:10.1002/acr2.1032), 2019-05-22

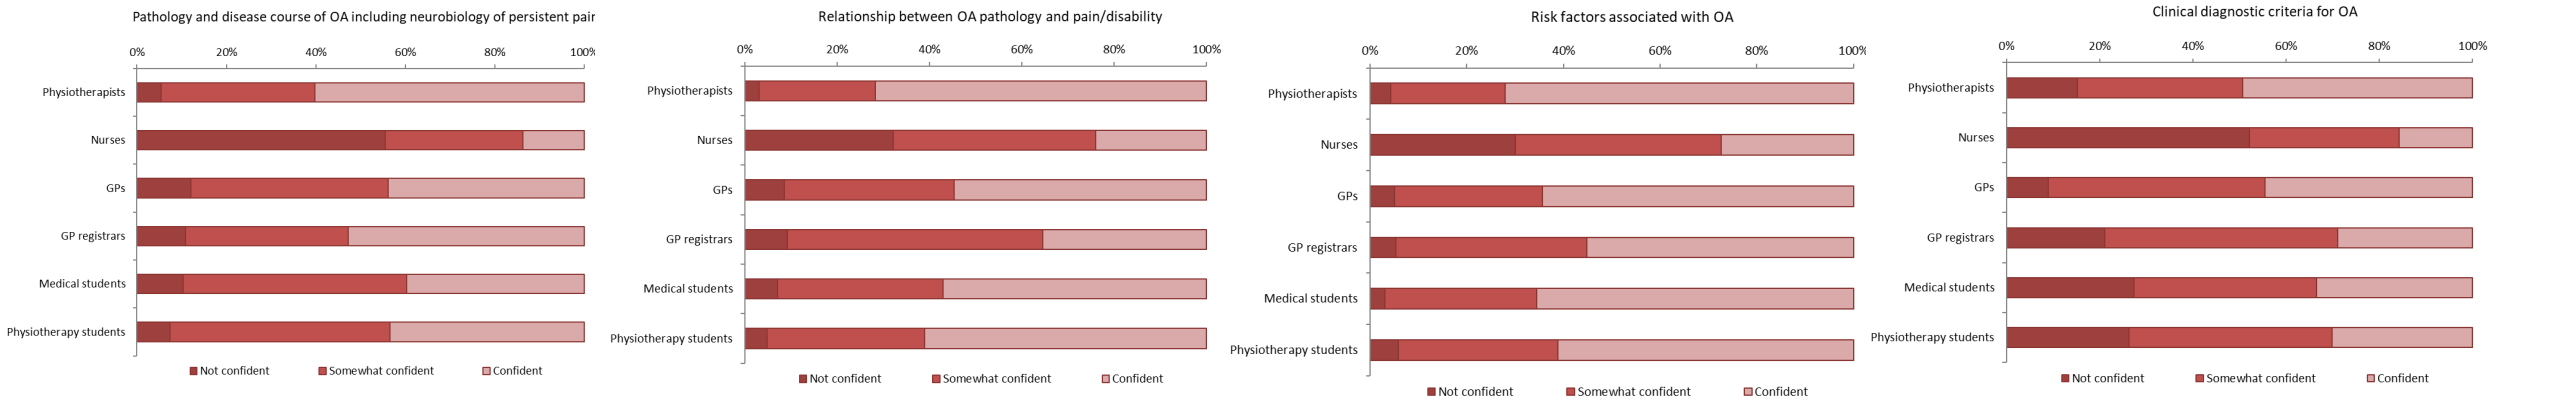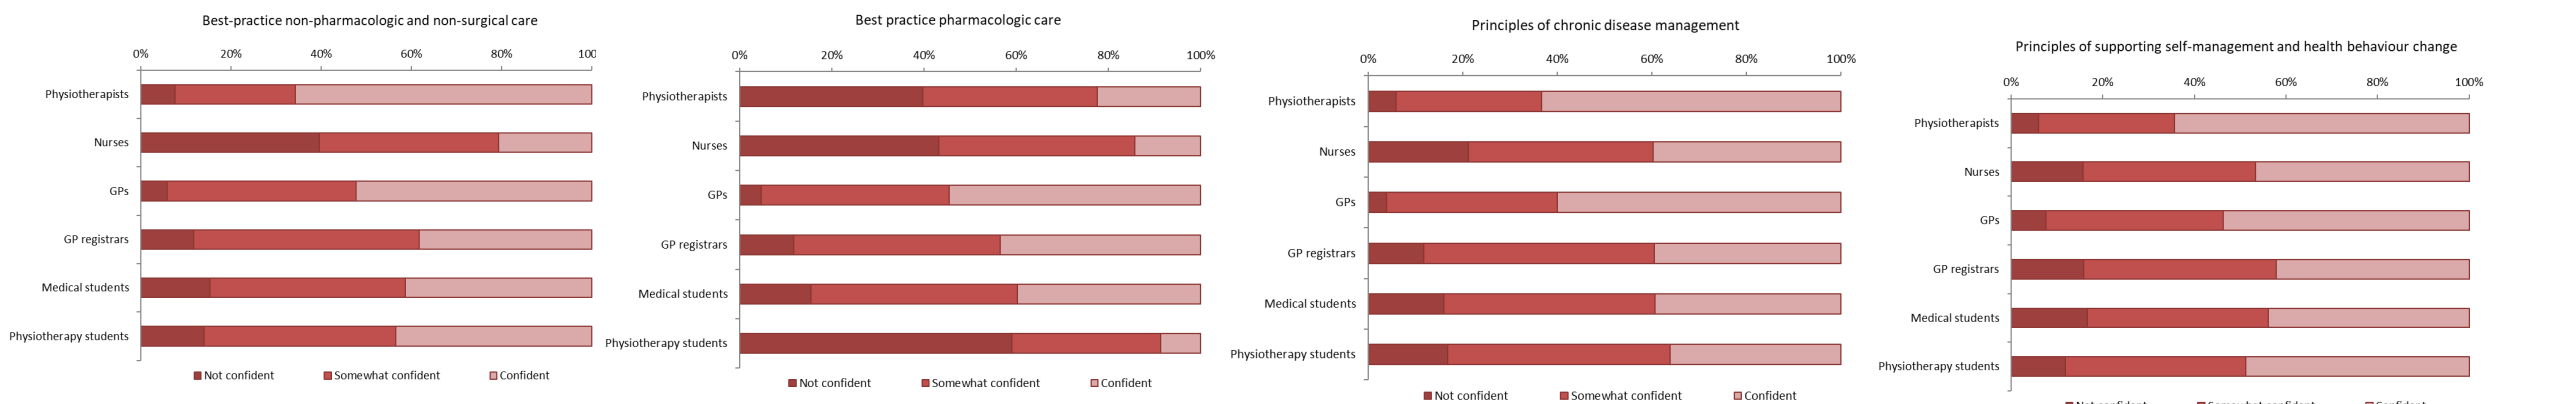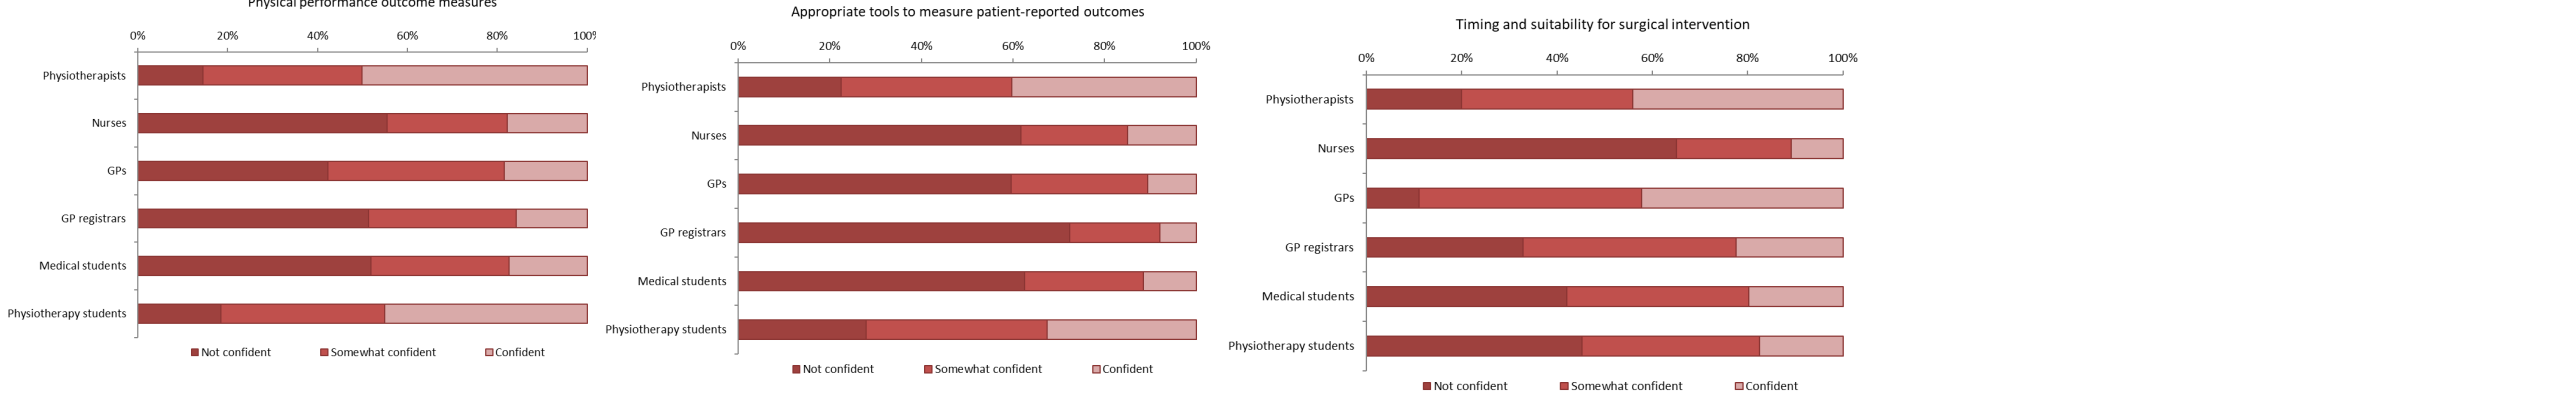

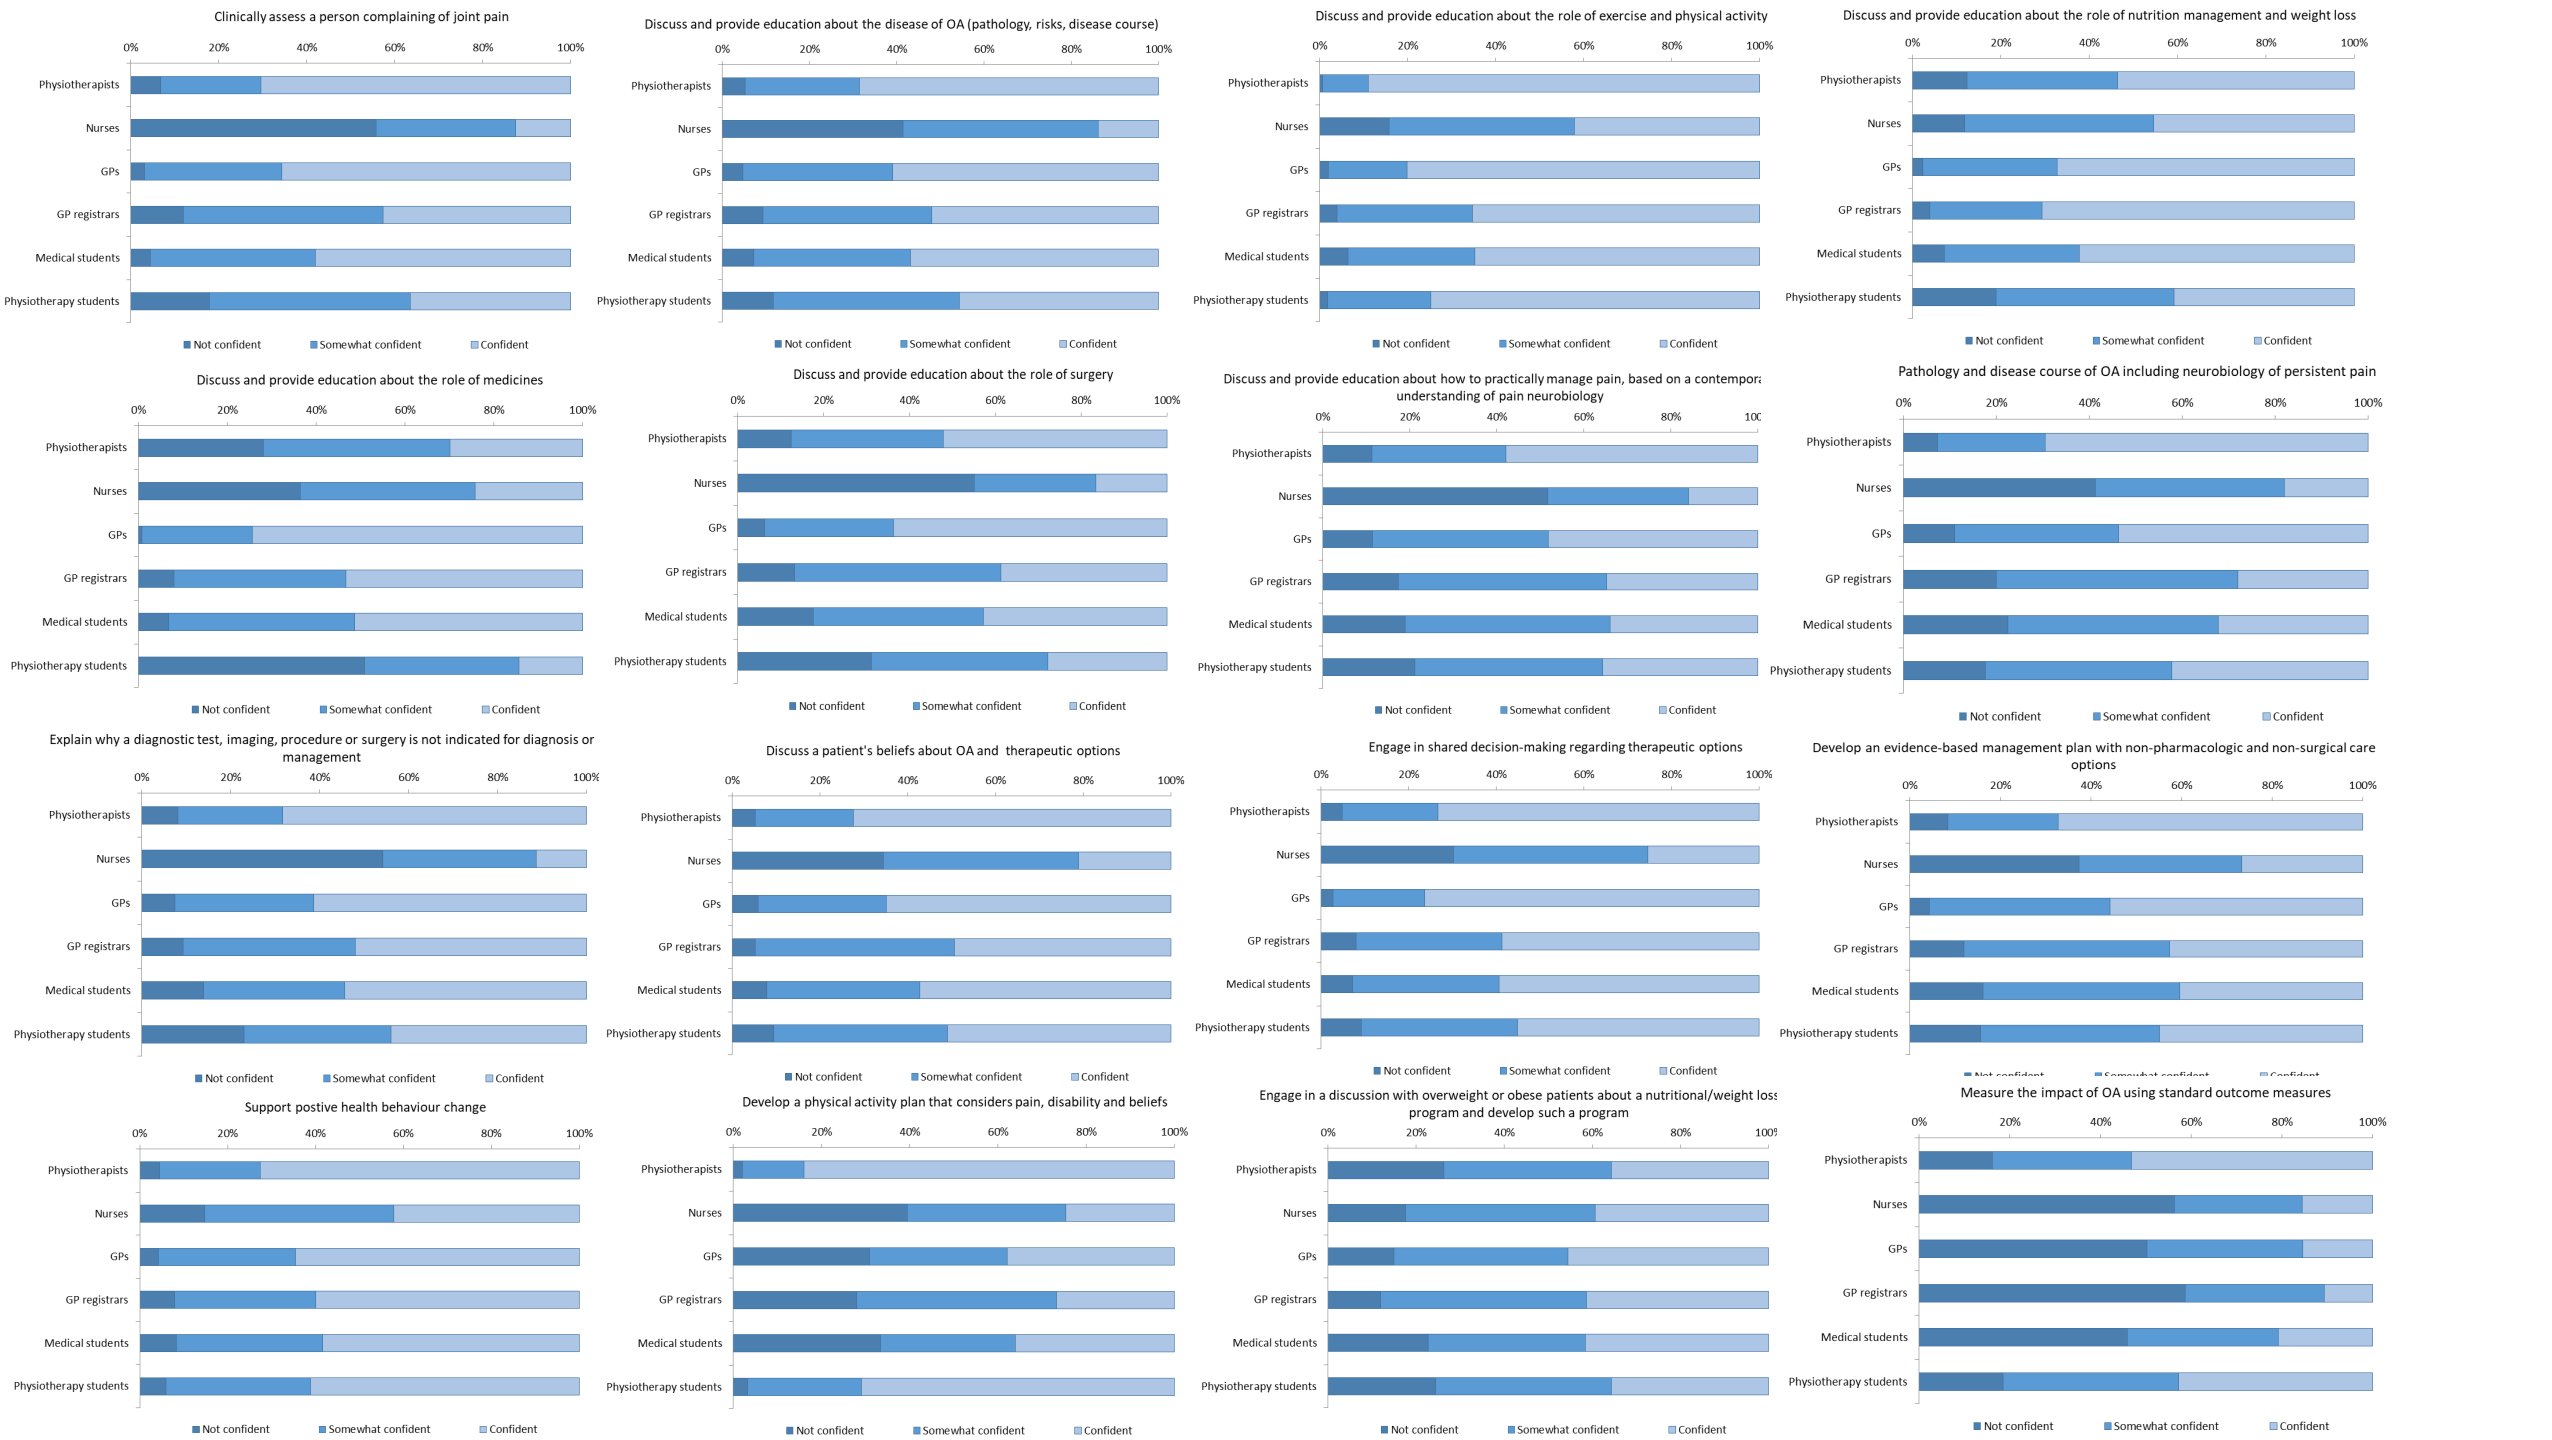

Supplement: ACR2-1-219-s003.pdf [file ACR2-1-219-s003.pdf]
